# Supplementary material for: Cryotherapy for partial gland ablation of prostate cancer: Oncologic and safety outcomes
Source: PubMed Central journal article supplement (PMC10166973; doi:10.1002/cam4.5692), 2023-02-12
Supplement: CAM4-12-9351-s002.pdf [file CAM4-12-9351-s002.pdf]

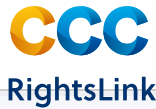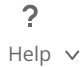

Help ▾

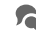

Live Chat

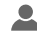

Leonard Marks ▾

## Hemigland Cryoablation of Clinically Significant Prostate Cancer: Intermediate-Term Followup via Magnetic Resonance Imaging Guided Biopsy

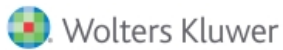

**Author:** Ryan Chuang, Adam Kinnaird, Lorna Kwan, et al

**Publication:** Journal of Urology

**Publisher:** Wolters Kluwer Health, Inc.

**Date:** Sep 28, 2020

*Copyright © 2020, Wolters Kluwer Health*

### Order Completed

Thank you for your order.

This Agreement between Leonard S Marks ("You") and Wolters Kluwer Health, Inc. ("Wolters Kluwer Health, Inc.") consists of your order details and the terms and conditions provided by Wolters Kluwer Health, Inc. and Copyright Clearance Center.

**License number**                      Reference confirmation email for license number

**License date**                        Nov, 10 2022

#### Licensed Content

|                                     |                                                                                                                                           |
|-------------------------------------|-------------------------------------------------------------------------------------------------------------------------------------------|
| <b>Licensed Content Publisher</b>   | Wolters Kluwer Health, Inc.                                                                                                               |
| <b>Licensed Content Publication</b> | Journal of Urology                                                                                                                        |
| <b>Licensed Content Title</b>       | Hemigland Cryoablation of Clinically Significant Prostate Cancer: Intermediate-Term Followup via Magnetic Resonance Imaging Guided Biopsy |
| <b>Licensed Content Author</b>      | Ryan Chuang, Adam Kinnaird, Lorna Kwan, et al                                                                                             |
| <b>Licensed Content Date</b>        | Sep 28, 2020                                                                                                                              |
| <b>Licensed Content Volume</b>      | 204                                                                                                                                       |
| <b>Licensed Content Issue</b>       | 5                                                                                                                                         |

#### Order Details

|                                               |                              |
|-----------------------------------------------|------------------------------|
| <b>Type of Use</b>                            | Journal/Magazine             |
| <b>Requestor type</b>                         | STM Signatory Publisher      |
| <b>STM publisher name</b>                     | Wiley                        |
| <b>Format</b>                                 | Print and electronic         |
| <b>Portion</b>                                | Figures/tables/illustrations |
| <b>Number of figures/tables/illustrations</b> | 1                            |
| <b>Author of this Wolters Kluwer article</b>  | Yes                          |
| <b>Will you be translating?</b>               | No                           |
| <b>Intend to modify/change the content</b>    | No                           |
| <b>Publishing Open Access</b>                 | Yes                          |
| <b>Creative Commons License</b>               | CC-BY                        |

### About Your Work

**Title of new article** Cryotherapy for Partial Gland Ablation of Prostate Cancer

**Lead author** M. Aker

**Title of targeted journal** Cancer

**Publisher** Wiley

**Expected publication date** Aug 2023

### Requestor Location

**Requestor Location** Leonard S Marks  
924 Westwood Blvd  
Suite 520  
Los Angeles, CA 90095  
United States  
Attn: Leonard S Marks

### Billing Information

**Billing Type** Invoice  
Leonard S Marks  
924 Westwood Blvd  
Suite 520

**Billing address** Los Angeles, CA 90095  
United States  
Attn: Leonard S Marks

### Additional Data

**Order reference number** 501770748

**Portions** Figure 1, page 942, Journal of Urology Vol 204 (5), 2020

### Tax Details

**Publisher Tax ID** 13-2932696

### \$ Price

**Total** 0.00 USD

**Total: 0.00 USD**

**CLOSE WINDOW**
